# Supplementary material for: Characteristics and Comparative Genomic Analysis of a Novel Virus, VarioGold, the First Bacteriophage of Variovorax
Source: MDPI journal article supplement (doi:10.3390/ijms232113539), 2022-11-04
Supplement: s1 [file s1]

**Supplementary materials for**  
**Characteristics and comparative genomic analysis**  
**of a novel virus, VarioGold, the first bacteriophage**  
**of *Variovorax***

**Przemyslaw Decewicz, Michal Kitowicz and Monika Radlinska \***

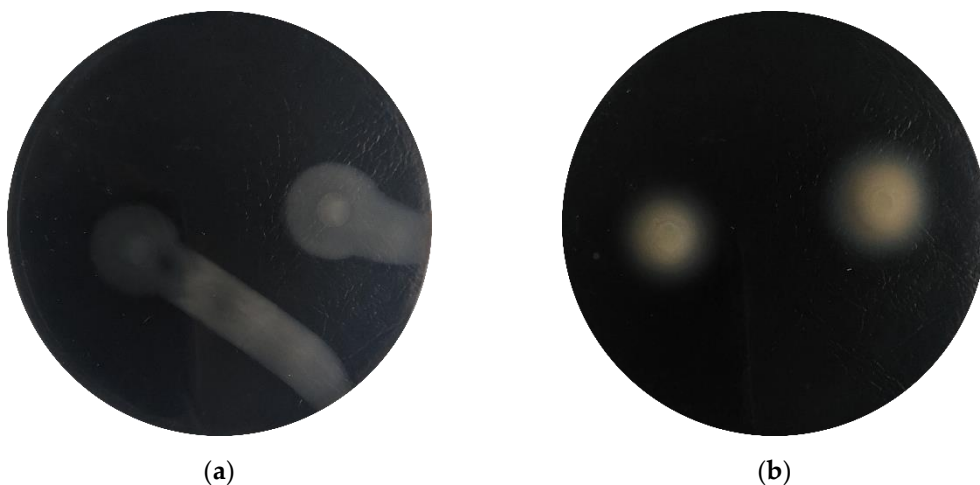

**Figure S1. Surface motility of *Variovorax* sp. ZS18.2.2 similar to swarming motion on: (a) R2A; (b) LB semi-solids.** The photograph was taken after 72h of incubation at 20°C. 10 µl of *Variovorax* sp. ZS18.2.2 overnight culture was applied at two spots on each plate with 0.5% R2A/LB semi-solid media. An analogous result was observed after similar time of incubation at 4 and 10°C (on both media) and at 30°C (only on the R2A).

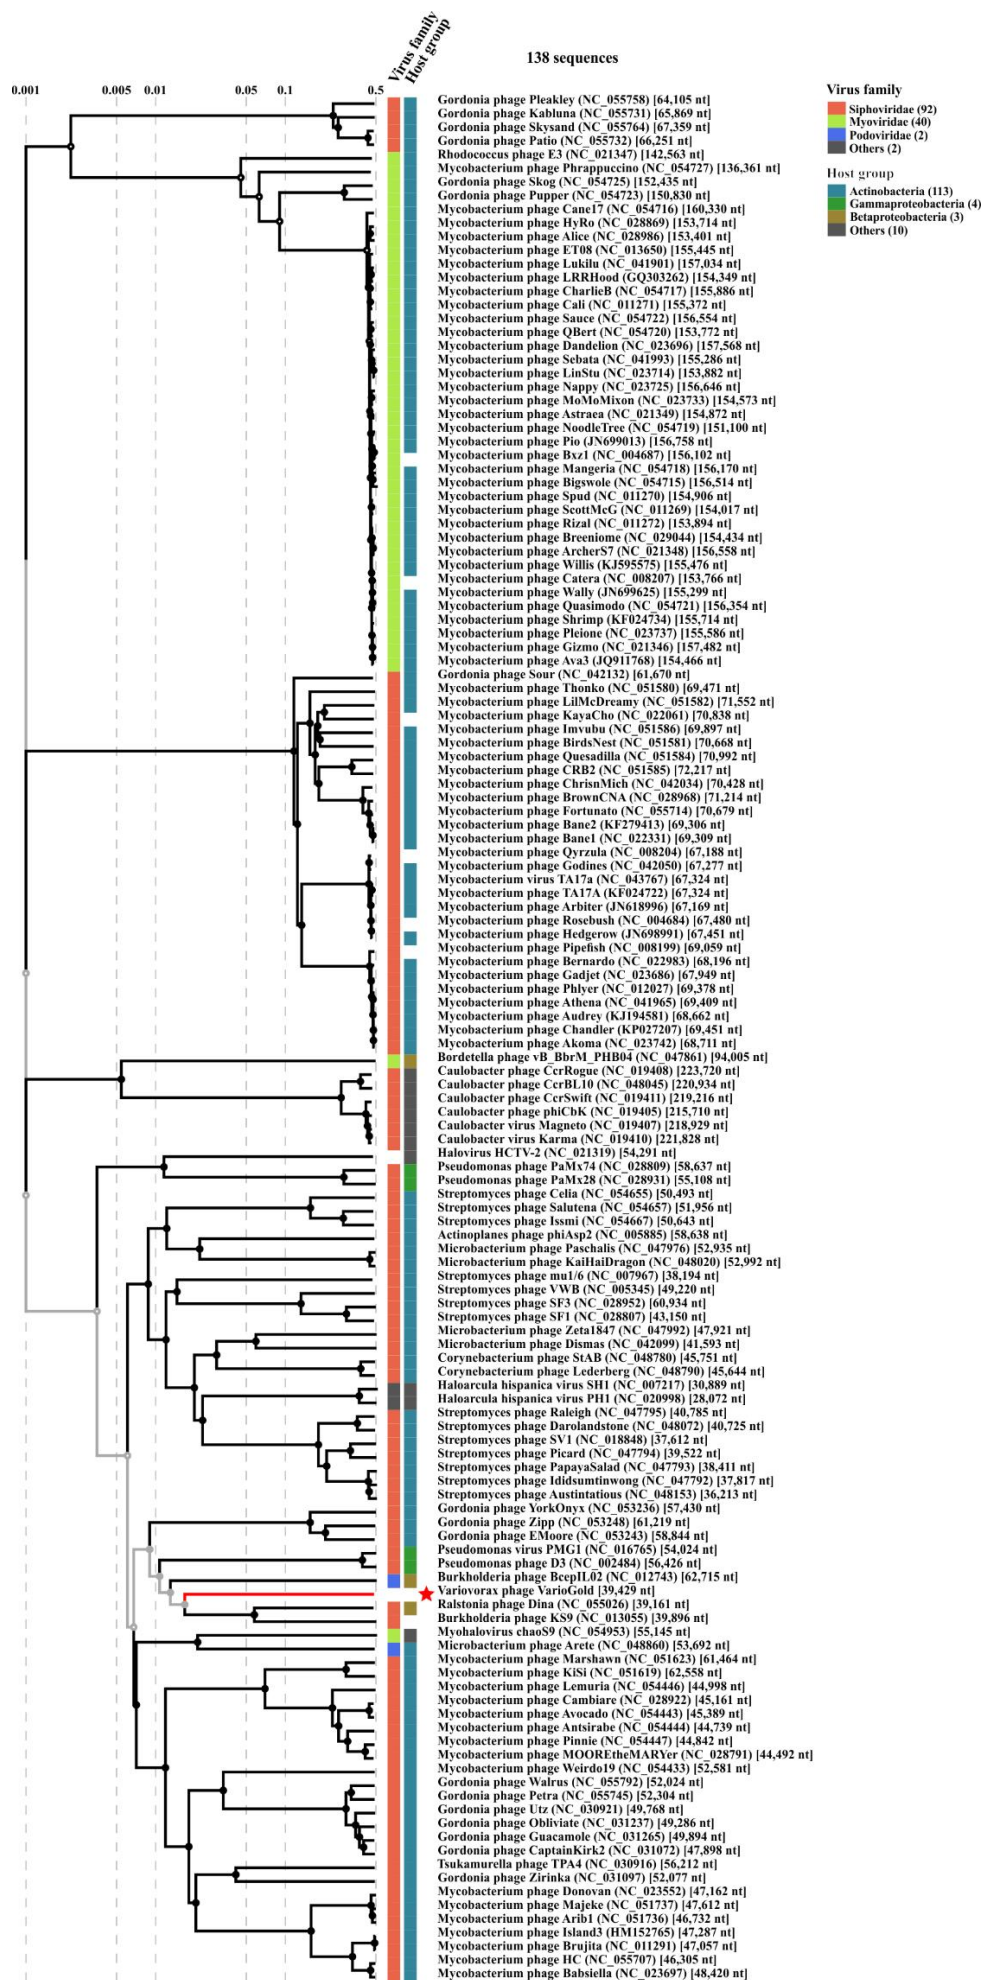

**Figure S2.** Proteomic-based tree of VarioGold and dsDNA viruses represented in the rectangular view generated with ViPTree software.

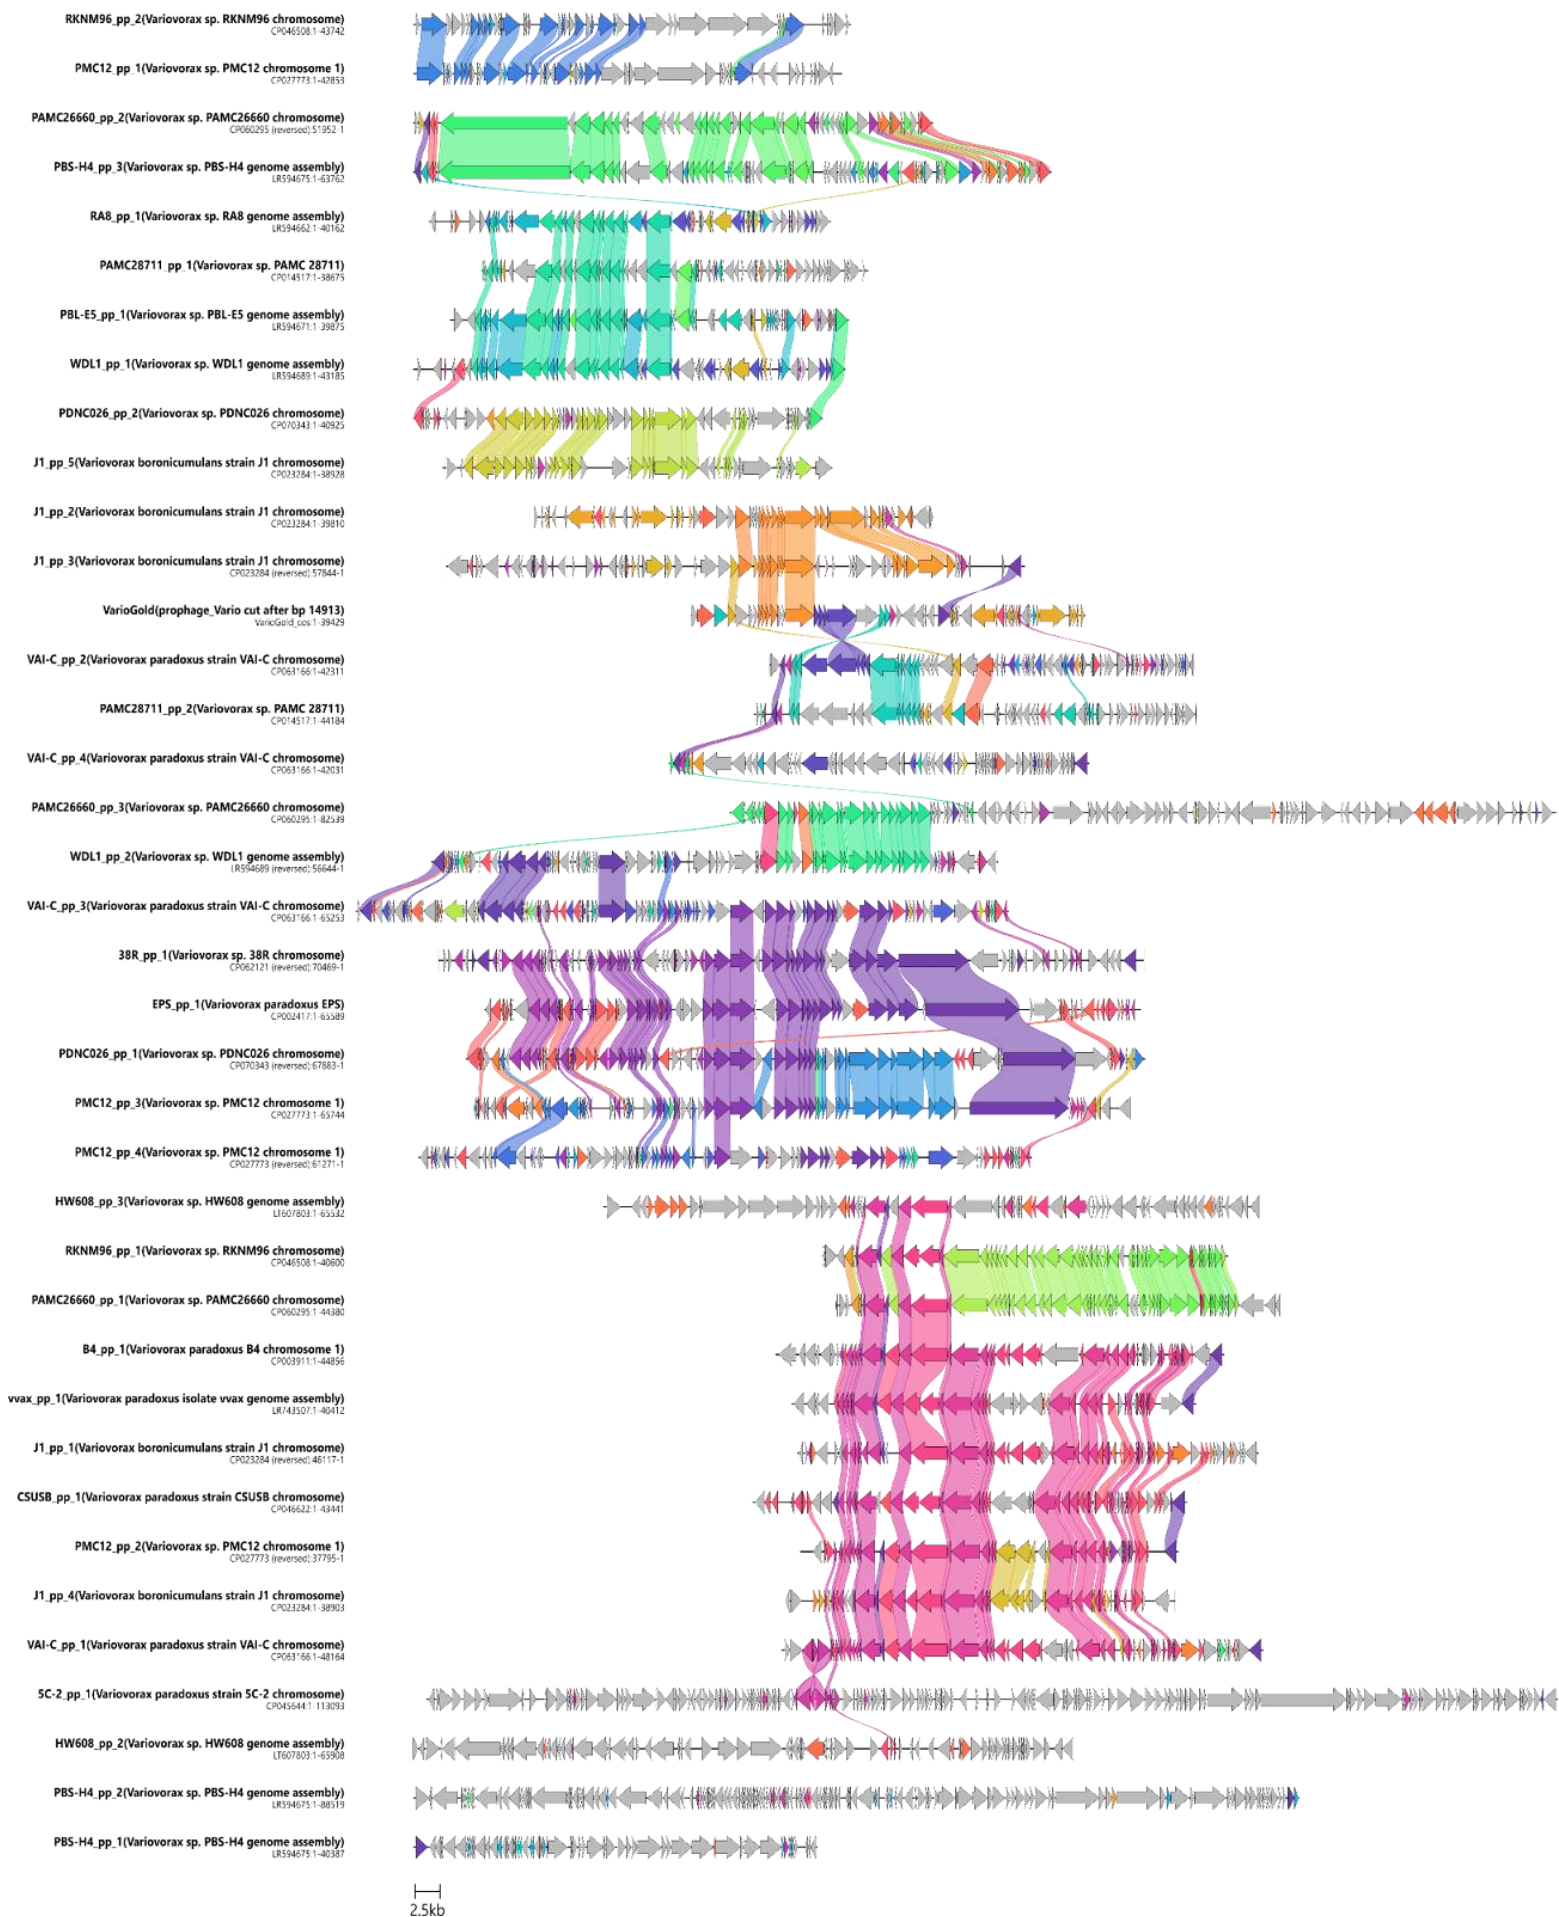

**Figure S3.** The genome alignment of the *Variovorax* (pro)phages. Phage genomes were delineated and reversed if required. Each protein-encoding feature was presented as an arrow. The colour of the arrow reflects a group of at least two proteins with a minimum 30 % sequence identity. These were additionally connected with blocks of the same colour.



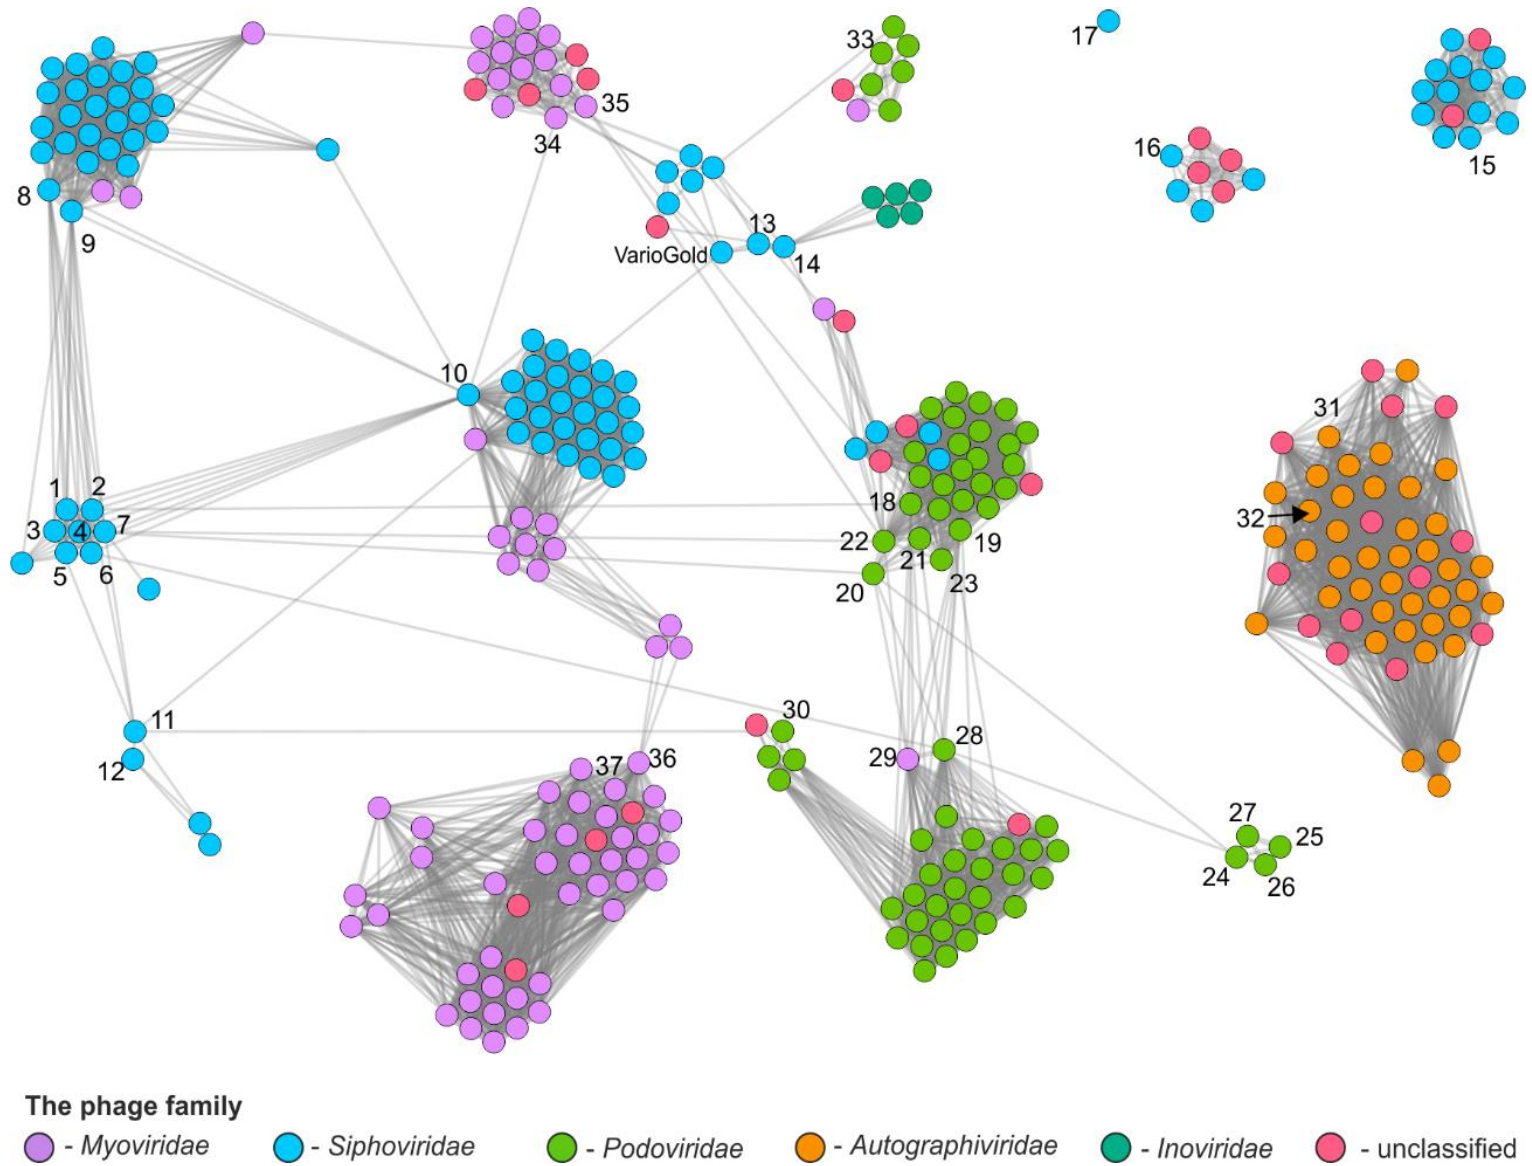

**Figure S4. Proteome-based similarity network.** *Variovorax* (pro)phages identified by us and viruses reflecting significant similarity to them were shown as nodes. The similarity is reflected by the presence of an edge between particular nodes. The colouring (in line with the key) refers to the previous taxonomic classification of *Caudoviricetes* families. Numbers next to the nodes symbolising *Variovorax* prophages correspond to the numbering in Table 2.

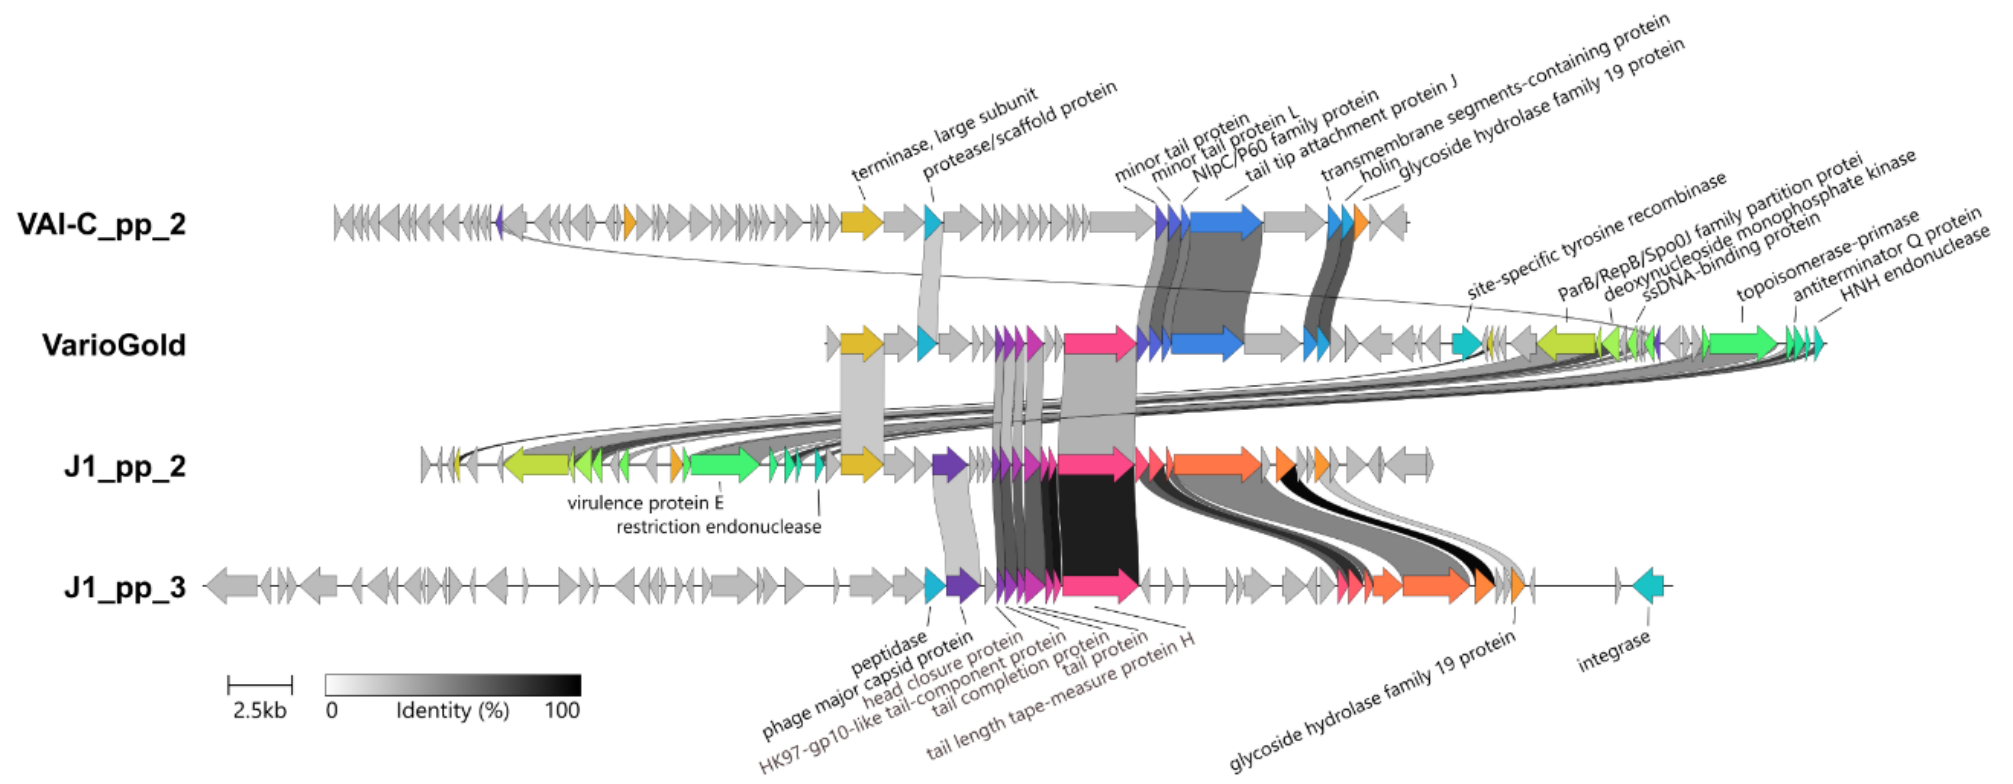

**Figure S5. The genome alignment of the VarioGold, J1\_pp\_2, J1\_pp\_3 and VAI-C\_pp\_2 (pro)phages.** Phage genomes were delineated and reversed if required. Each protein-encoding feature was presented as an arrow. The colour of arrow reflects a group of least two proteins with at least 30 % sequence identity. The colour of blocks connecting each arrow pair represents the level of sequence identity according to white-to-black scale. The arrows with products annotated as hypothetical proteins were not labelled.

**Table S1.** List of *Variovorax* strains characterized in terms of resistance to As (III) and As(V).

| Strain ID                  | Sample type                                  | Country/Territory<br>of origin | MTC* [mM] |       | Reference |
|----------------------------|----------------------------------------------|--------------------------------|-----------|-------|-----------|
|                            |                                              |                                | As (III)  | As(V) |           |
| <i>Variovorax</i> sp. MM-1 | Contaminated soil near<br>Lead Smelter Plant | Australia                      | 20        | 200   | [1]       |
| <i>Variovorax</i> sp. S3   | Woodland soil                                | USA                            | 0         | 30    | [2]       |
| <i>Variovorax</i> sp. S12  | Woodland soil                                | USA                            | 0         | 150   | [2]       |
| <i>V. paradoxus</i> DhaiF  | As-contaminated agronomic soil               | Bangladesh                     | 15        | 30    | [3]       |
| <i>V. gossypii</i> JM-310  | Internal root tissue of upland cotton        | USA                            | 9         | ND    | [4,5]     |
| <i>V. paradoxus</i> S110   | Interior of a potato plant                   | USA                            | 8,9       | ND    | [4,6]     |

\* MTC – maximum tolerable concentration; ND – no data

**Table S2.** List of *Variovorax* strains used in prophage identification.

| Strain ID                        | Accession No. | Genome size [bp] | Sample Type                                            | Country/Territory of origin |
|----------------------------------|---------------|------------------|--------------------------------------------------------|-----------------------------|
| <i>V. paradoxus</i> EPS          | CP002417      | 6,550,056        | Soil from the coastal sage scrub rhizosphere           | USA                         |
| <i>V. paradoxus</i> B4           | CP003911      | 7,148,516        | Contaminated soil near a chemical factory              | ND                          |
| <i>Variovorax</i> sp. PAMC28711  | CP014517      | 4,316,152        | Thallus of Antarctic lichen <i>Himantormia</i> sp.     | Antarctica                  |
| <i>V. boronicumulans</i> J1      | CP023284      | 7,137,898        | Unspecified soil                                       | China                       |
| <i>Variovorax</i> sp. PMC12      | CP027773      | 7,015,237        | Potting soil from tomato rhizosphere                   | South Korea                 |
| <i>V. paradoxus</i> 5C-2         | CP045644      | 7,288,087        | Heavy metals-contaminated mining waste                 | Italy                       |
| <i>V. paradoxus</i> CSUSB        | CP046622      | 5,574,400        | Lower chaparral/coastal sage brush soil from sunflower | USA                         |
| <i>Variovorax</i> sp. PAMC26660  | CP060295      | 7,388,698        | Antarctic lichen                                       | Antarctica                  |
| <i>Variovorax</i> sp. PAMC28562  | CP060296      | 4,693,528        | Unspecified soil                                       | Antarctica                  |
| <i>Variovorax</i> sp. 38R        | CP062121      | 6,870,625        | Atrazine-contaminated agronomic soil                   | France                      |
| <i>Variovorax</i> sp. PDNC026    | CP070343      | 7,110,136        | Plastic debris in land/lake environment                | USA                         |
| <i>Variovorax</i> sp. RKNM96     | CP046508      | 7,168,845        | Unspecified soil                                       | Canada                      |
| <i>Variovorax</i> sp. HW608      | LT607803      | 7,733,665        | Soil of the Luqillo Experimental Forest                | Puerto Rico                 |
| <i>Variovorax</i> sp. PBL-H6     | LR594659      | 6,871,554        | Linurion-contaminated agronomic soil                   | Belgium                     |
| <i>Variovorax</i> sp. SRS16      | LR594666      | 7,674,934        | Linurion-contaminated agronomic soil                   | Denmark                     |
| <i>Variovorax</i> sp. RA8        | LR594662      | 7,424,241        | Riverbed sediment                                      | Japan                       |
| <i>Variovorax</i> sp. PBL-E5     | LR594671      | 7,086,410        | Linurion-contaminated agronomic soil                   | Denmark                     |
| <i>Variovorax</i> sp. PBS-H4     | LR594675      | 6,652,076        | Linurion-contaminated agronomic soil                   | Belgium                     |
| <i>Variovorax</i> sp. WDL1       | LR594689      | 8,360,137        | Linurion-contaminated agronomic soil                   | Belgium                     |
| <i>V. paradoxus</i> VAI-C        | CP063166      | 9,439,028        | College campus soil                                    | USA                         |
| <i>V. paradoxus</i> vvax (LAD61) | LR743507      | 7,257,405        | The leaf of common dandelion                           | ND                          |

ND – no data



## References

1. Bahar, M.M.; Megharaj, M.; Naidu, R. Kinetics of arsenite oxidation by *Variovorax* sp. MM-1 isolated from a soil and identification of arsenite oxidase gene. *J Hazard Mater* **2013**, *262*, 997-1003, doi:10.1016/j.jhazmat.2012.11.064.
2. Jackson, C.R.; Harrison, K.G.; Dugas, S.L. Enumeration and characterization of culturable arsenate resistant bacteria in a large estuary. *Syst Appl Microbiol* **2005**, *28*, 727-734, doi:10.1016/j.syapm.2005.05.012.
3. Bachate, S.P.; Cavalca, L.; Andreoni, V. Arsenic-resistant bacteria isolated from agricultural soils of Bangladesh and characterization of arsenate-reducing strains. *J Appl Microbiol* **2009**, *107*, 145-156, doi:10.1111/j.1365-2672.2009.04188.x.
4. Flores-Duarte, N.J.; Pérez-Pérez, J.; Navarro-Torre, S.; Mateos-Naranjo, E.; Redondo-Gómez, S.; Pajuelo, E.; Rodríguez-Llorente, I.D. Improved. *Plants (Basel)* **2022**, *11*, doi:10.3390/plants11081091.
5. Kämpfer, P.; Busse, H.J.; McInroy, J.A.; Glaeser, S.P. *Variovorax gossypii* sp. nov., isolated from *Gossypium hirsutum*. *Int J Syst Evol Microbiol* **2015**, *65*, 4335-4340, doi:10.1099/ijsem.0.000581.
6. Han, J.I.; Choi, H.K.; Lee, S.W.; Orwin, P.M.; Kim, J.; Laroe, S.L.; Kim, T.G.; O'Neil, J.; Leadbetter, J.R.; Lee, S.Y.; et al. Complete genome sequence of the metabolically versatile plant growth-promoting endophyte *Variovorax paradoxus* S110. *J Bacteriol* **2011**, *193*, 1183-1190, doi:10.1128/JB.00925-10.
